# Supplementary material for: Youth insights on menstrual health and hygiene in Burkina Faso; a comparison of written versus spoken qualitative text
Source: Research Square preprint supplement (doi:10.21203/rs.3.rs-6837276/v1), 2025-06-13
Supplement: Supplementary file 1 [file 7355a6b872ec10a7b1fe86f1.pdf]

**Interview Tool**  
**Menstruation and Menstrual Hygiene Management: Experiences and**  
**Opportunities in rural Burkina Faso**  
**Interviews with Stakeholders\***

*\*Stakeholders refers to girls and mothers, teachers and participants of the mini testing phase and representatives engaged in school water and hygiene policy or interventions, from UNICEF, non-governmental organizations (NGOs), Ministry of Health (MoH) or Education (MoE) and/or school board members*

**To start let me say that there are no right or wrong answers to my questions. I am here to learn from you because you are the expert on your experiences and views of the issue of interest -- Menstruation, Sanitary Products, School Attendance, Empowerment and Attitudes. I am here to gather information from you so that others (within Nouna, Burkina Faso, Southern Africa and globally) can learn about the experiences here and they can use that information to make or modify other MHM programs including the provision of sanitary products in order to improve the life of girls and women worldwide.**

**WP2 Part 1: Meeting with girls, mothers and teachers pre-distribution, question in diary**

1. Opening question: What is your age? In which village do/did you go to school?
2. I am here today to talk about menstruation. Please tell me words that come to mind when I say the word "menstruation". (*Write girls responses on a sheet of paper; probe on points that are especially interesting to us, so points on hygiene or sanitary products*)
3. Please describe any good things that you associate with having a period.
4. Please describe any bad things that you associate with having a period.
5. What are words you have used or heard when people talk about menstruation or girls who are menstruating?
6. What does it mean for a girl in Burkina Faso to start menstruating?
  - a. How do people treat a girl before she menstruates compared to after she starts to menstruate?
7. Now I would like to talk about your own menstruation. You are welcome to tell me as much as you would like to tell. There is no right or wrong answer.
8. Did you learn about menstruation before having your first period?
  - a. Who talked to you about it?
  - b. How did the conversation go?
  - c. Do you remember when you first got your period? Please walk me through that day.
    - i. Did you tell anybody when you got your period for the first time?
    - ii. How did you feel about it?
9. Nowadays, we see that girls around the world get information about their periods from all kinds of places. Where do you get information? Who do you talk about it? Why do you

- talk about it with this person and not with others? Do the teachers talk about it in school?  
Do you talk about it with your mom? Why or why not?
10. How was your most recent experience?
- a. Probe on preparation. (Please tell me whether you felt prepared? What would have made you feel more prepared?)
11. What do girls do if they get their periods in school?
- a. Who can they ask for help?
  - b. What does the help consist of?
    - i. Are there supplies at school?
    - ii. What is privacy like?
    - iii. Is there a place to dispose of sanitary products/device in school?
12. Have you or girls you know ever missed school because of a period?
13. Now I'd like to talk about menstruation supplies. Which sanitary products do you know about? Which ones do you use?
- a. What do you like/dislike about each product?
  - b. Where do you keep your product(s)?
  - c. Who provides these supplies to you?
  - d. Is there another product you would like to use and if so, please tell me about that product.
    - i. Why would you like to use that product?
14. What do you think would make it easier when you are menstruating? Which one of the products that we discussed do you think other girls in Nouna would like to use? (Would you like to try any of these products?) What are your concerns about them? Would you be okay with your daughter trying these new products? Why or why not? What would be the best mechanism for distributing or creating sanitary products?
15. Is there anything else you would like to tell me about menstruation? About how girls manage their periods in Burkina Faso?
16. I'm happy to answer any questions you have.

**Thank you**

**WP2 Part 2: Meeting with girls and teachers post-distribution and question in diary**

1. It's wonderful to see you again. I would again like to talk about menstruation and menstruation supplies.
2. The last time we met, girls in your group told me about menstruation and used words like (insert words from the FGD, particularly related to menstrual hygiene management)
  - a. How would you describe menstrual hygiene management now? Would you use the same words or do you have more words to describe it?
3. Please describe your experiences with (name the product used by the girl).
  - a. Have you tried the product?
  - b. What are some of the things that you did not like about the product?
  - c. What are some of the things you liked about this product?
  - d. How was the experience changing it at school/home?
  - e. If you could, would you want to use this product again, why or why not?
  - f. Please compare this product to the approach you were using before?
4. Now please tell me about the way you received the product and the feedback you got while you had the product.
  - a. Who guided you in terms of how to use this product?
  - b. How did that conversation go?
  - c. What more would you have liked to know?
  - d. Where did you receive this product? Who gave you the product?
    - i. Would you prefer to continue receiving the product this way, or would you rather receive the product in a different place?
    - ii. Who might be a better person to receive the product from?
5. Is there anything else you would like to tell me about using this product? About how girls manage their periods in Burkina Faso?
6. I'm happy to answer any questions you have.

**Thank you**
