# Supplementary material for: Youth insights on menstrual health and hygiene in Burkina Faso; a comparison of written versus spoken qualitative text
Source: Research Square preprint supplement (doi:10.21203/rs.3.rs-6837276/v1), 2025-06-13
Supplement: Supplementary file 2 [file 9e6f6ed1afb55cba379e8dd4.pdf]

# My Little Diary

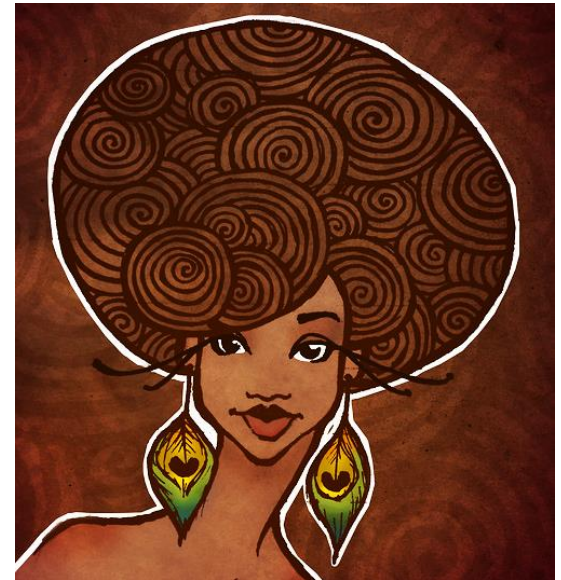

[tyleramato.deviant.com](https://tyleramato.deviant.com)

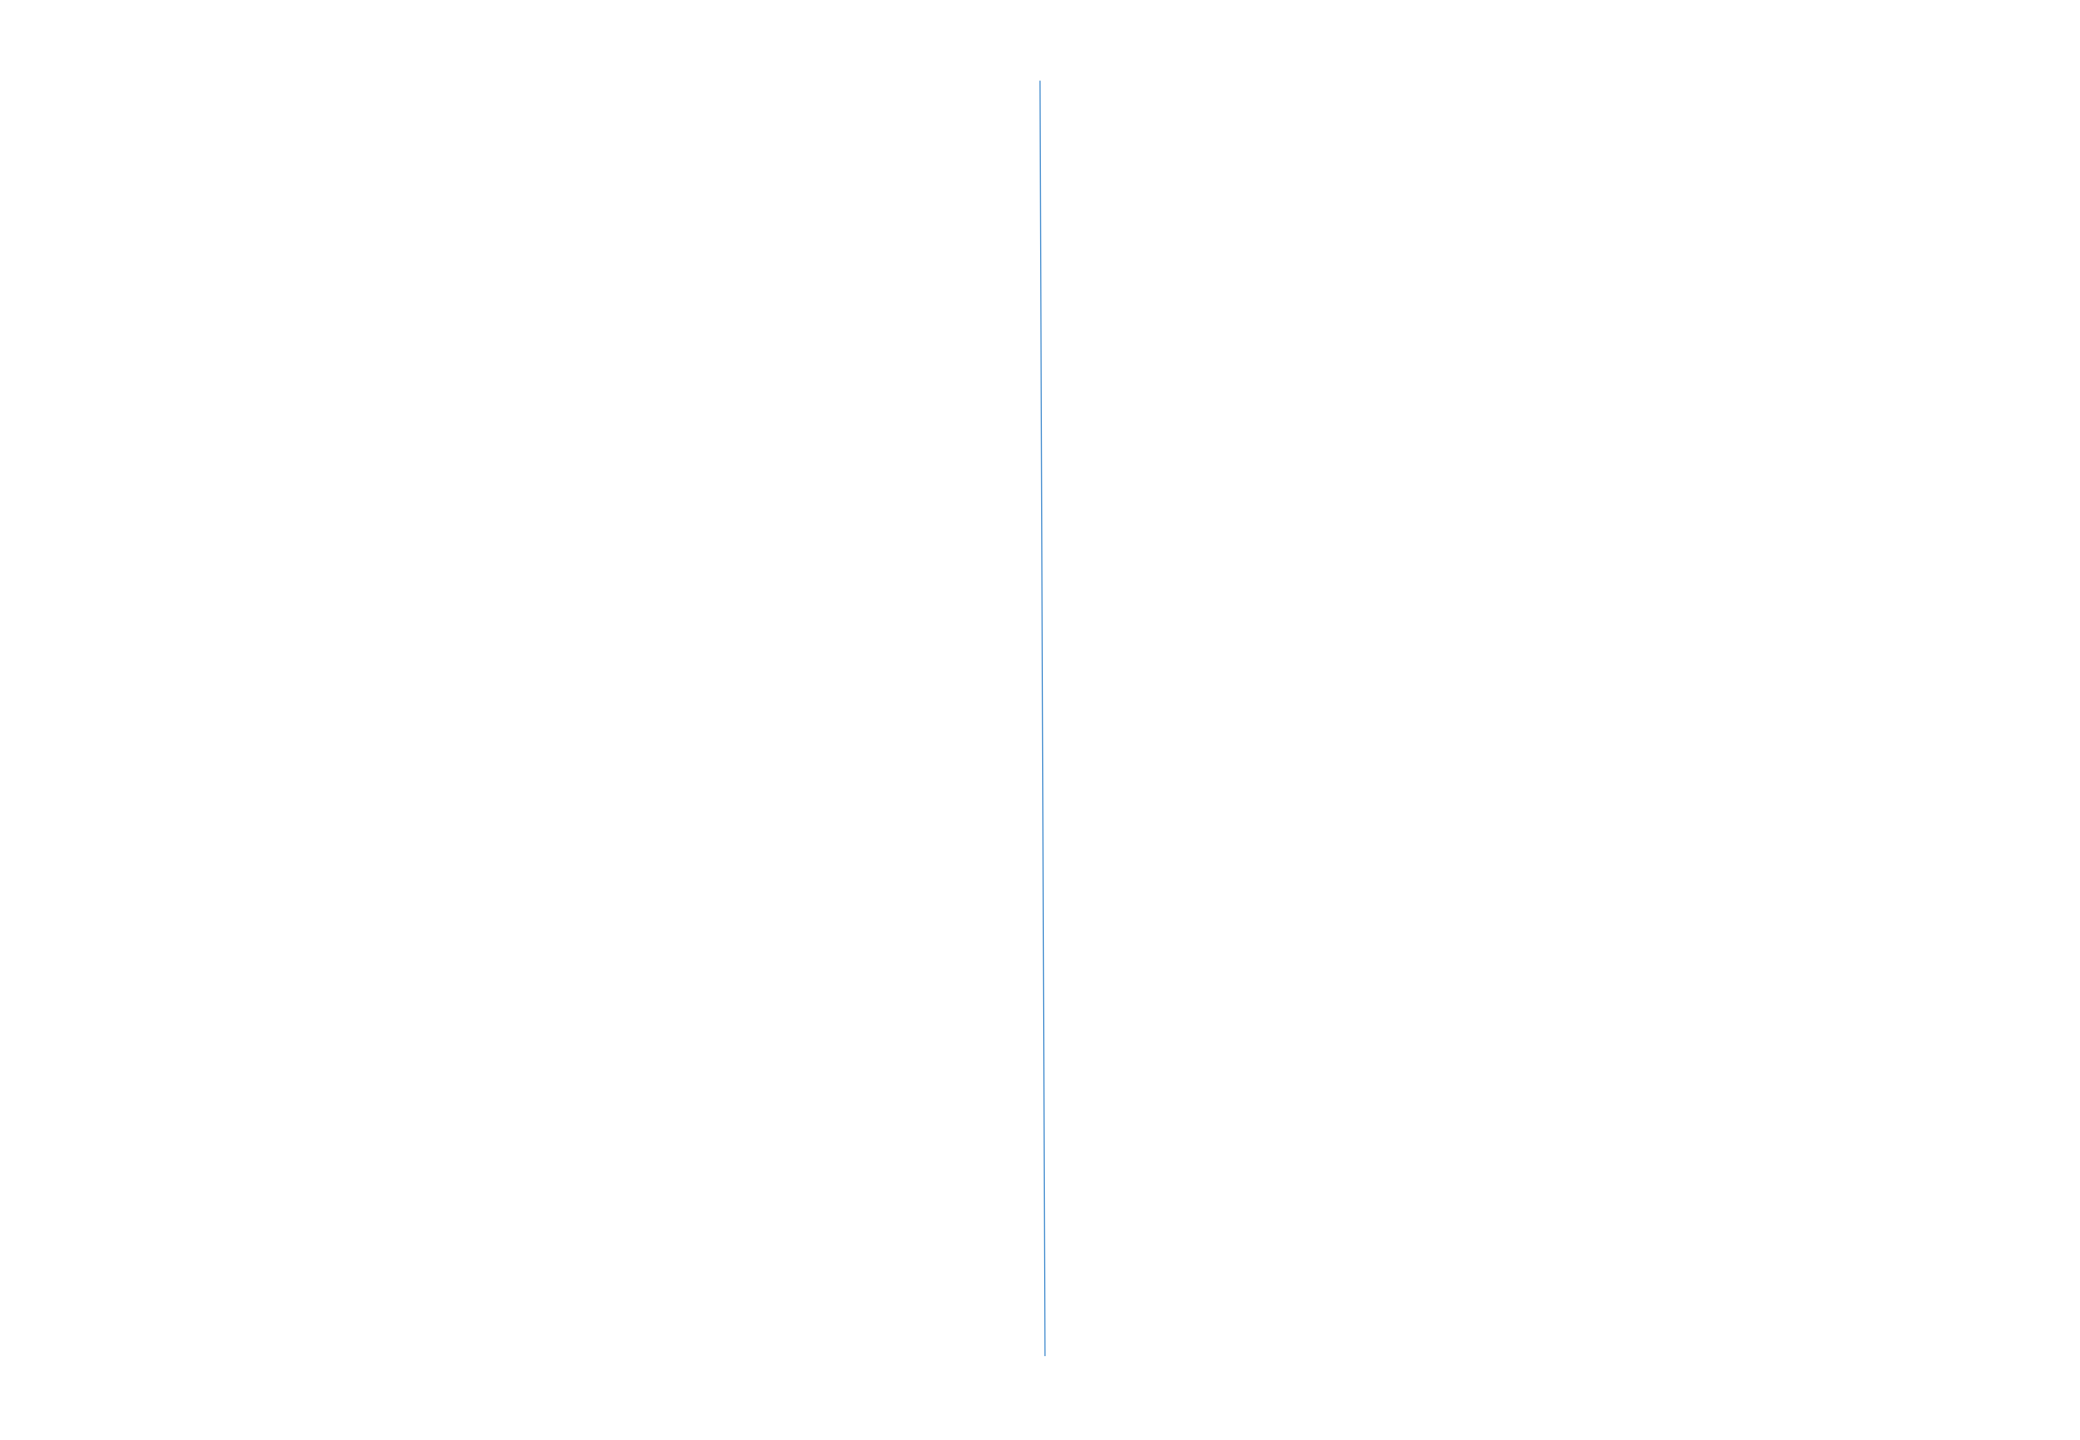

One last exercise: How can you describe your situation before and after using your product of choice comparatively? You can draw in each of the sections, if you want to, instead of writing.

*Avant*

*Après*

*Dear friend,*

*We are so happy you are participating in this study. We hope this experience is useful for you.*

*This diary consists of several parts. We have suggested some questions we would like you to reflect on and answer each month. You will also find, at the end of each month, several blank pages for you to write your own ideas and thoughts during these first months using the product. We would like that you express yourself freely on the topics you find interesting or important about the product and its use. Write about the product and its use. Don't forget to complete page 24*

*We will return to your school afterwards to discuss with you about these topics, but you can contact us any time if you have any questions before that. You can always call the colleagues that gave you this diary or write an email to XX at this address: XX*

## General questions

How old are you?.....

How old were you when you had your period for the first time?.....

What product did you choose?.....

Here you can mark how your experience with your period was each month. How did you feel, in a scale of 1-5, where 5 is best?

### First month

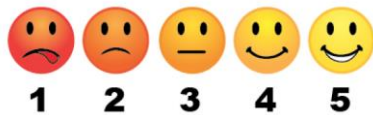

## Second month

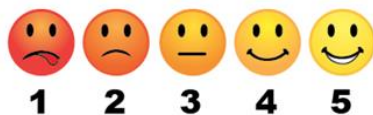This image shows a full page of white paper with horizontal dashed lines, typical of primary-ruled notebook paper. The lines are evenly spaced and run across the width of the page. There are no margins, text, or other markings on the paper.

[illegible]

## Questions about your experience

**To answer during the first month**

1. Why did you choose this product? What do you like about it?  
What not? What is important for you in a sanitary product to have  
your period comfortably? .....

This image shows a full page of primary-ruled paper. It features ten sets of horizontal dashed lines, each set consisting of three parallel lines. These lines are evenly spaced vertically across the entire page, providing a guide for handwriting practice. The background is white, and there are no margins or other markings present.

2. Who gave you the product? How was the talk with her when she explained to you how to use it? What did you like about the way you received your product? What would you change? What would you have liked to know about the product? .....

.....

.....

.....

.....

.....

.....

.....

.....

.....

.....

.....

.....

.....

.....

.....

.....

.....

.....

.....

.....

.....

.....

.....

.....

.....

.....

.....

.....

.....

.....

.....

.....

.....

.....

.....

.....

.....

.....

.....

.....

.....

.....

[illegible]

20

3. Was it easy to use the product? Why or why not? What was the difference between using the product at school or at home?

[illegible]

[illegible]This image shows a full page of primary-ruled paper. It features multiple sets of horizontal dashed lines spaced evenly down the page, providing a guide for handwriting practice. The background is white, and there are no margins or other markings present.

5. Are there any other things you would like to say about the product? Would you like to share anything else with us?

[illegible]

18

5. Are there any other things you would like to share about how it was to use the product? Would you like to tell us any else?

[illegible]

# My thoughts and ideas

.....

.....

.....

.....

.....

.....

.....

.....

.....

.....

.....

.....

.....

.....

.....

.....

.....

.....

.....

.....

.....

4. Are there any difficulties you still find using the product? Have you discovered new things you like? What about things you don't like?

.....

.....

.....

.....

.....

.....

.....

.....

.....

.....

.....

.....

.....

.....

.....

.....

.....

.....

.....

.....

.....

[illegible]This image shows a full page of primary-ruled paper. It features multiple horizontal rows, each consisting of two parallel dashed lines with a small gap between them, providing a guide for letter height and placement. The background is white, and the lines are evenly spaced across the entire page.

This image shows a full page of a handwriting practice worksheet. It consists of multiple rows of horizontal dashed lines spaced evenly down the page, providing a guide for letter height and placement. The background is plain white, and there are no other markings or text present.

3. If you had new doubts or questions, who did you speak to? Was it helpful? Why or why not? With whom would you prefer to talk about these things? Why?.....

[illegible]

[illegible]

[illegible]

**To answer during the second month**

1. How did you feel when your period came this month? How do you describe your experience with the product during these last 2 months? .....

[illegible]
